# Supplementary material for: Characterization of Conserved and Promiscuous Human Rhinovirus CD4 T Cell Epitopes
Source: Preprints.org preprint supplement (doi:10.20944/preprints202108.0002.v1), 2021-08-02
Supplement: Supplementary file 1 [file Figure S1.doc]

**Figure S1.** **Peptide-specific IFNγ production by CD8 T cells.** PBMCs from Donor #2 previously expanded (see Materials and Methods) were stimulated with 10μM of HRVA65-82 peptide in the presence of Brefeldin A, labeled with anti-CD8 antibody and stained intracellularly for IFN. Data is expressed as the percentage of IFNγ-producing CD8 T cells within the total of gated-CD8 T cells. Basal IFNγ production was obtained by incubating donor PBMCs without the addition of exogenous peptides. CEF peptide pool was used as positive control and the irrelevant peptide HRVA2029-2037 (YGDDVIFSY) as negative control.
