# Supplementary material for: Characterization of Conserved and Promiscuous Human Rhinovirus CD4 T Cell Epitopes
Source: Preprints.org preprint supplement (doi:10.20944/preprints202108.0002.v1), 2021-08-02
Supplement: Supplementary file 2 [file Table S1.doc]

**Table S1.** HLA II molecules used for predicting peptide binding.

| **HLA-DRB1** | | **HLA-DQA1/DQB1** | |
| --- | --- | --- | --- |
| **Molecule** | **Prediction Method** | **Molecule** | **Prediction Method** |
| DRB1*01:01 | RANKPEP and NETMHCII | DQA1*01:01/B1*05:01 | RANKPEP and NETMHCII |
| DRB1*01:03 | NETMHCII | DQA1*01:02/B1*05:01 | NETMHCII |
| DRB1*03:01 | RANKPEP and NETMHCII | DQA1*01:02/B1*05:02 | NETMHCII |
| DRB1*04:01 | RANKPEP and NETMHCII | DQA1*01:02/B1*06:02 | RANKPEP and NETMHCII |
| DRB1*04:02 | RANKPEP and NETMHCII | DQA1*01:03/B1*06:03 | NETMHCII |
| DRB1*04:03 | NETMHCII | DQA1*01:04/B1*05:03 | NETMHCII |
| DRB1*04:04 | RANKPEP and NETMHCII | DQA1*02:01/B1*02:02 | NETMHCII |
| DRB1*04:05 | RANKPEP and NETMHCII | DQA1*02:01/B1*03:01 | NETMHCII |
| DRB1*07:01 | RANKPEP and NETMHCII | DQA1*02:01/B1*03:03 | NETMHCII |
| DRB1*08:01 | RANKPEP and NETMHCII | DQA1*02:01/B1*04:02 | NETMHCII |
| DRB1*08:02 | NETMHCII | DQA1*03:01/B1*03:01 | NETMHCII |
| DRB1*09:01 | RANKPEP and NETMHCII | DQA1*03:01/B1*03:02 | RANKPEP and NETMHCII |
| DRB1*10:01 | NETMHCII | DQA1*03:03/B1*04:02 | NETMHCII |
| DRB1*11:01 | RANKPEP and NETMHCII | DQA1*04:01/B1*04:02 | NETMHCII |
| DRB1*11:04 | RANKPEP and NETMHCII | DQA1*05:01/B1*02:01 | RANKPEP and NETMHCII |
| DRB1*13:01 | RANKPEP and NETMHCII | DQA1*05:01/B1*03:01 | NETMHCII |
| DRB1*13:02 | RANKPEP and NETMHCII | DQA1*05:01/B1*03:02 | NETMHCII |
| DRB1*15:01 | RANKPEP and NETMHCII | DQA1*05:01/B1*03:03 | NETMHCII |
| DRB1*15:02 | NETMHCII | DQA1*05:01/B1*04:02 | NETMHCII |
| DRB1*16:02 | NETMHCII | DQA1*06:01/B1*04:02 | NETMHCII |
