# Supplementary material for: Characterization of Conserved and Promiscuous Human Rhinovirus CD4 T Cell Epitopes
Source: Preprints.org preprint supplement (doi:10.20944/preprints202108.0002.v1), 2021-08-02
Supplement: Supplementary file 4 [file Table S3.doc]

**Table S3. IFNγ-responses from HLA II-typed donors to HRV-specific CD4 T cell epitopes.**

| **Peptide** | **Sequence** | **Predicted HLA II binding allele 1** | | **Confirmed HLA II binding allele 2** | | **HLA II typing of the responding donors** | | | | | | |
| --- | --- | --- | --- | --- | --- | --- | --- | --- | --- | --- | --- | --- |
| **DRB1** | **DQA1/B1** | **DRB1** | **DQA1/B1** | **Donor** | **DRB1** | **DRB1** | **DQA1** | **DQA1** | **DQB1** | **DQB1** |
| HRVA 57-74 | VKDVLEKGIPTLQSPTVE | DRB1*11:01 | DQA1*01:02/B1*06:02 | - | DQA1*01:02/B1*06:02 | #1 | 07:01 | 11:01 | 01:02 | 03:01 | 03:03 | 03:01 |
| #2 | 07:01 | 11:04 | 02:01 | 05:01 | 02:02 | 03:01 |
| #3 | 03:01 | 11:01 | 03:01 | 05:01 | 02:01 | 03:01 |
| HRVA 89-106 | DSTITSQDVANAVVGYGV | - | DQA1*01:02/B1*06:02 DQA1*02:01/B1*02:02 DQA1*03:01/B1*03:01 DQA1*05:01/B1*03:01 | DRB1*04:04 **DRB1*07:01** | DQA1*01:02/B1*06:02  **DQA1*02:01/B1*02:02 DQA1*03:01/B1*03:01** DQA1*05:01/B1*02:01 **DQA1*05:01/B1*03:01** | #1 | 07:01 | 11:01 | 01:02 | 03:01 | 03:03 | 03:01 |
| #2 | 07:01 | 11:04 | 02:01 | 05:01 | 02:02 | 03:01 |
| #3 | 03:01 | 11:01 | 03:01 | 05:01 | 02:01 | 03:01 |
| HRVA 97-114 | VANAVVGYGVWPHYLTPE | DRB1*04:04 | DQA1*01:01/B1*05:01 DQA1*03:01/B1*03:01 DQA1*05:01/B1*03:01 DQA1*05:01/B1*04:02 DQA1*06:01/B1*04:02 | DRB1*08:02 | DQA1*01:01/B1*05:01  **DQA1*05:01/B1*02:01 DQA1*05:01/B1*03:01** | #1 | 07:01 | 11:01 | 01:02 | 03:01 | 03:03 | 03:01 |
| #2 | 07:01 | 11:04 | 02:01 | 05:01 | 02:02 | 03:01 |
| #3 | 03:01 | 11:01 | 03:01 | 05:01 | 02:01 | 03:01 |
| HRVC 258-274 | INLRTNNSSTIVVPYIN | DRB1*13:02 | DQA1*01:02/B1*05:01  DQA1*01:02/B1*06:02  DQA1*01:03/B1*06:03 DQA1*02:01/B1*03:03 DQA1*05:01/B1*03:03 | **DRB1*07:01** DRB1*09:01 DRB1*13:02 | DQA1*01:02/B1*06:02  **DQA1*02:01/B1*02:02** | #1 | 07:01 | 11:01 | 01:02 | 03:01 | 03:03 | 03:01 |
| #2 | 07:01 | 11:04 | 02:01 | 05:01 | 02:02 | 03:01 |
| HRVC1582-1592 | KEKFRDIRRFIP | DRB1*08:02  DRB1*11:01 | - | DRB1*08:02 **DRB1*11:01 DRB1*11:04** | - | #1 | 07:01 | 11:01 | 01:02 | 03:01 | 03:03 | 03:01 |
| #2 | 07:01 | 11:04 | 02:01 | 05:01 | 02:02 | 03:01 |
| #3 | 03:01 | 11:01 | 03:01 | 05:01 | 02:01 | 03:01 |
| HRVC 1791-1806 | GLEPLDLNTSAGFPYV | DRB1*07:01  DRB1*09:01  DRB1*13:02 | **-** | DRB1*09:01 DRB1*13:02 | **DQA1*02:01/B1*02:02** | #1 | 07:01 | 11:01 | 01:02 | 03:01 | 03:03 | 03:01 |
| #2 | 07:01 | 11:04 | 02:01 | 05:01 | 02:02 | 03:01 |
| #3 | 03:01 | 11:01 | 03:01 | 05:01 | 02:01 | 03:01 |
| HRVC1835-1847 | DLPYVTYLKDELR | - | DQA1*02:01/B1*02:02 DQA1*05:01/B1*02:01 | DRB1*04:04 | **DQA1*05:01/B1*02:01** | #2 | 07:01 | 11:04 | 02:01 | 05:01 | 02:02 | 03:01 |
| #3 | 03:01 | 11:01 | 03:01 | 05:01 | 02:01 | 03:01 |

1 HLA I molecules predicted to bind the corresponding peptides as retrieved by RANKPEP and NETMHCII servers. 2 HLA II molecule experimentally confirmed to bind the peptide with a high binding affinity (IC50 < 1000 nM). HLA II molecules matching any of the alleles expressed by the responding donors are highlighted in bold.
